# Supplementary material for: Perfluorooctane sulfonate affects intestinal immunity against bacterial infection
Source: PubMed Central journal article supplement (PMC5507904; doi:10.1038/s41598-017-04091-z), 2017-07-12
Supplement: 41598_2017_4091_MOESM1_ESM.pdf [file 41598_2017_4091_MOESM1_ESM.pdf]

## Supplemental Information

Perfluorooctane sulfonate affects intestinal immunity against bacterial infection

Caixia Suo, Zhiqin Fan, Liang Zhou and Ju Qiu

Inventory of Supporting Online Materials

- Figure S1 PFOS has no effect on change of body weight at steady state
- Figure S2 Short-term treatment of PFOS promotes the IL-22 production from ILC3 under the steady state
- Figure S3 PFOS has no impact on IL-1 $\beta$  and IL-23 mRNA expression
- Figure S4 PFOS has no cytotoxic effect *in vitro*
- Figure S5 PFOS promotes IL-22 production from ILC3 on a per-cell-based level *in vitro* through Ahr
- Figure S6 PFOS promotes IFN- $\gamma$  production from both non-T and T cells *in vitro*
- Figure S7 Long-term PFOS treatment promotes production of IL-22 from both ILC3 and Th17 cells under the steady state
- Figure S8 PFOS affects the expression of RELM- $\beta$  and mucin 2 under the steady state
- Supplemental figure legends
- Table S1. Primers used for Realtime RT-PCR
- Table S2 16S rRNA gene specific primers used in this study
- Supplemental References

Figure S1

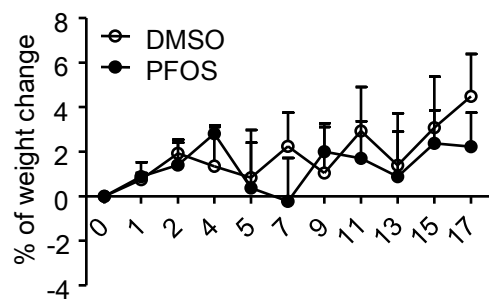

# Figure S2

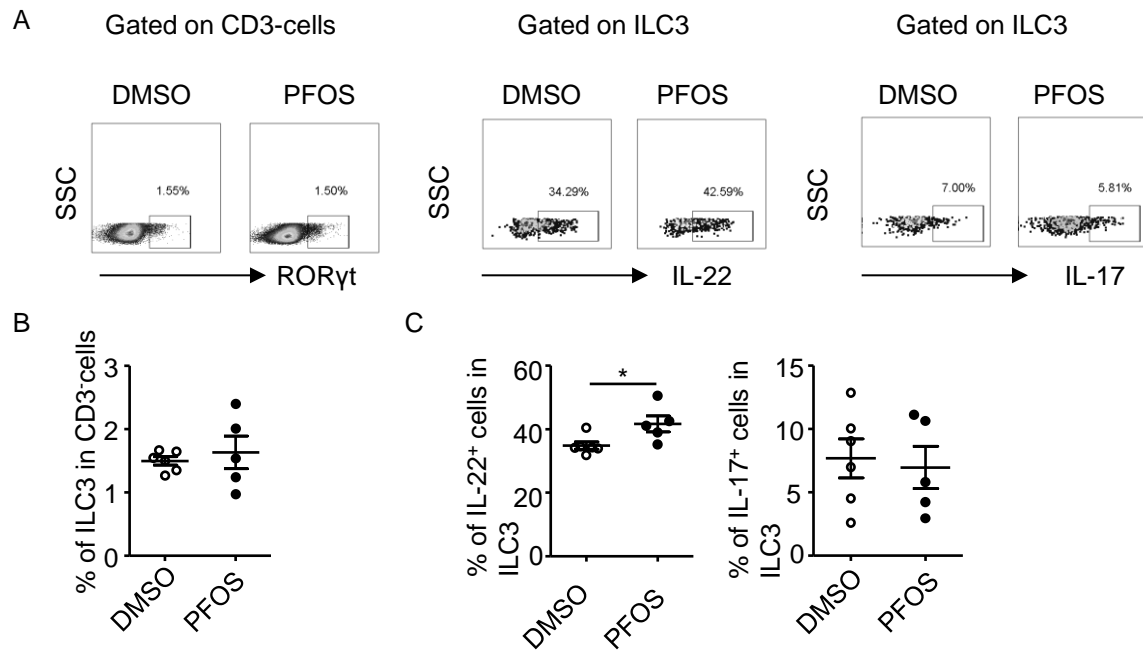

Figure S3

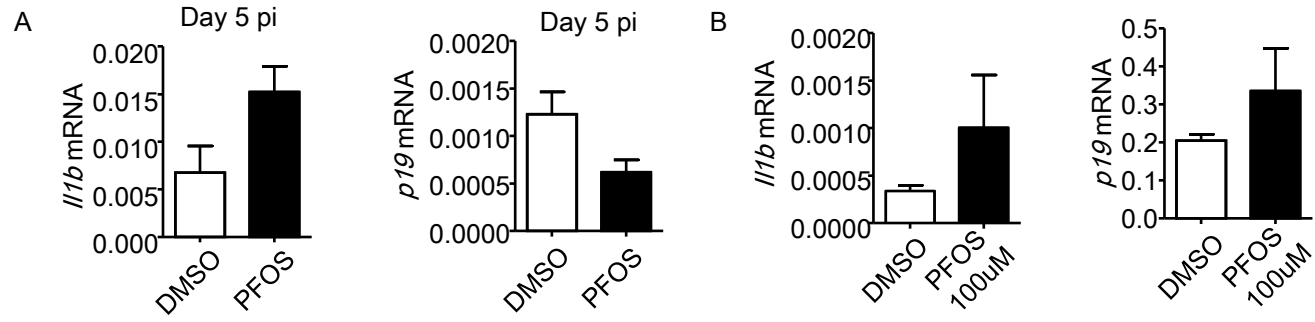

Figure S4

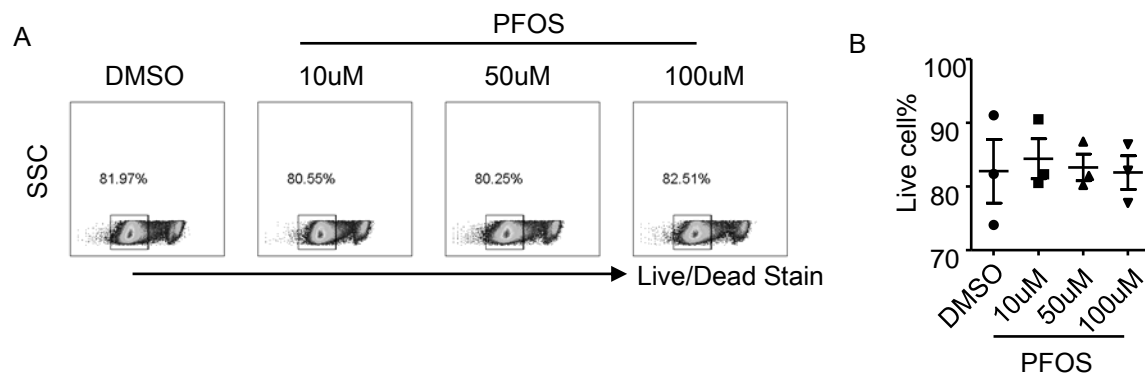

Figure S5

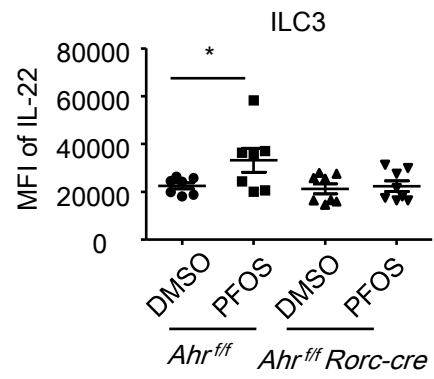

Figure S6

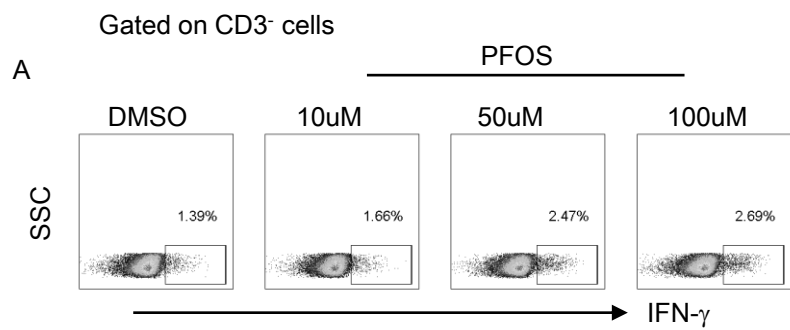

B

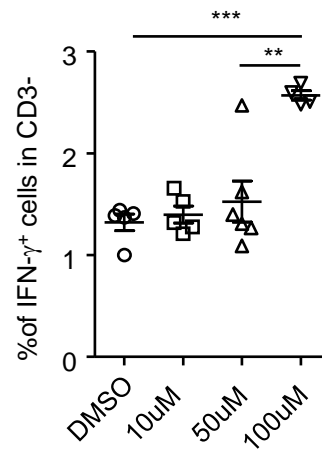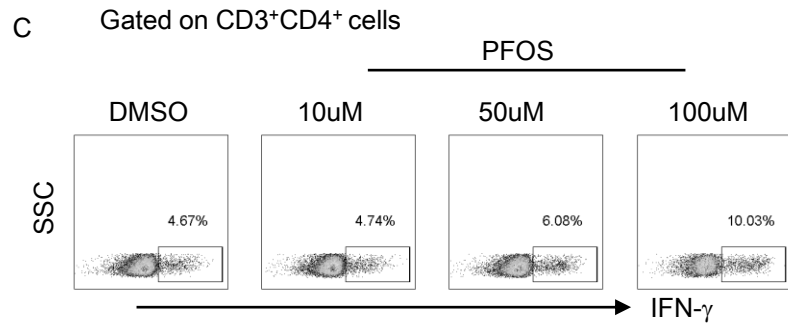

D

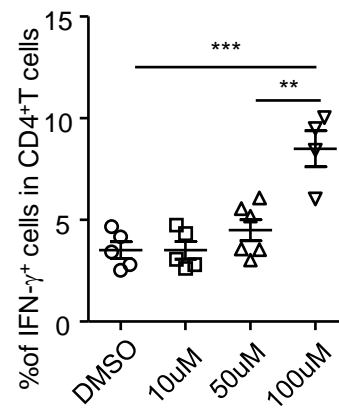

Figure S7

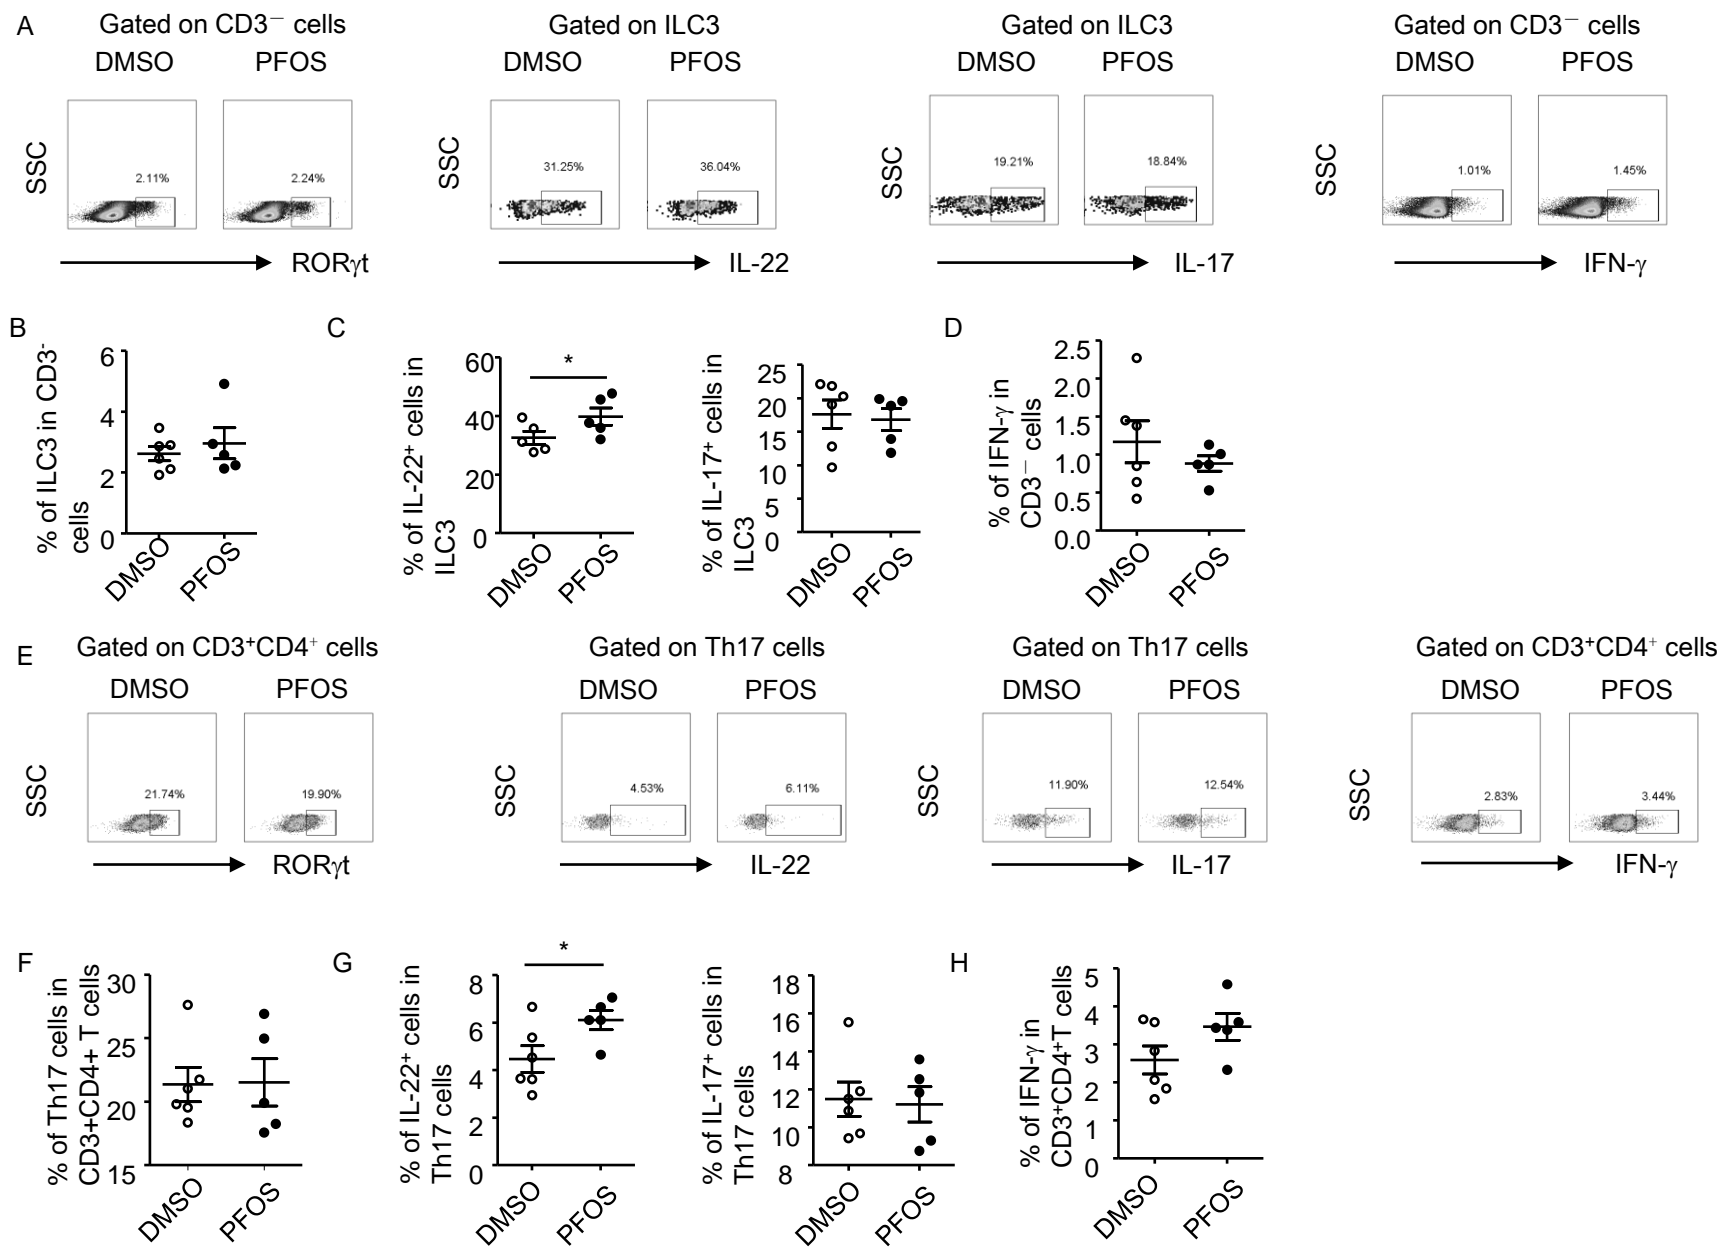



Figure S8

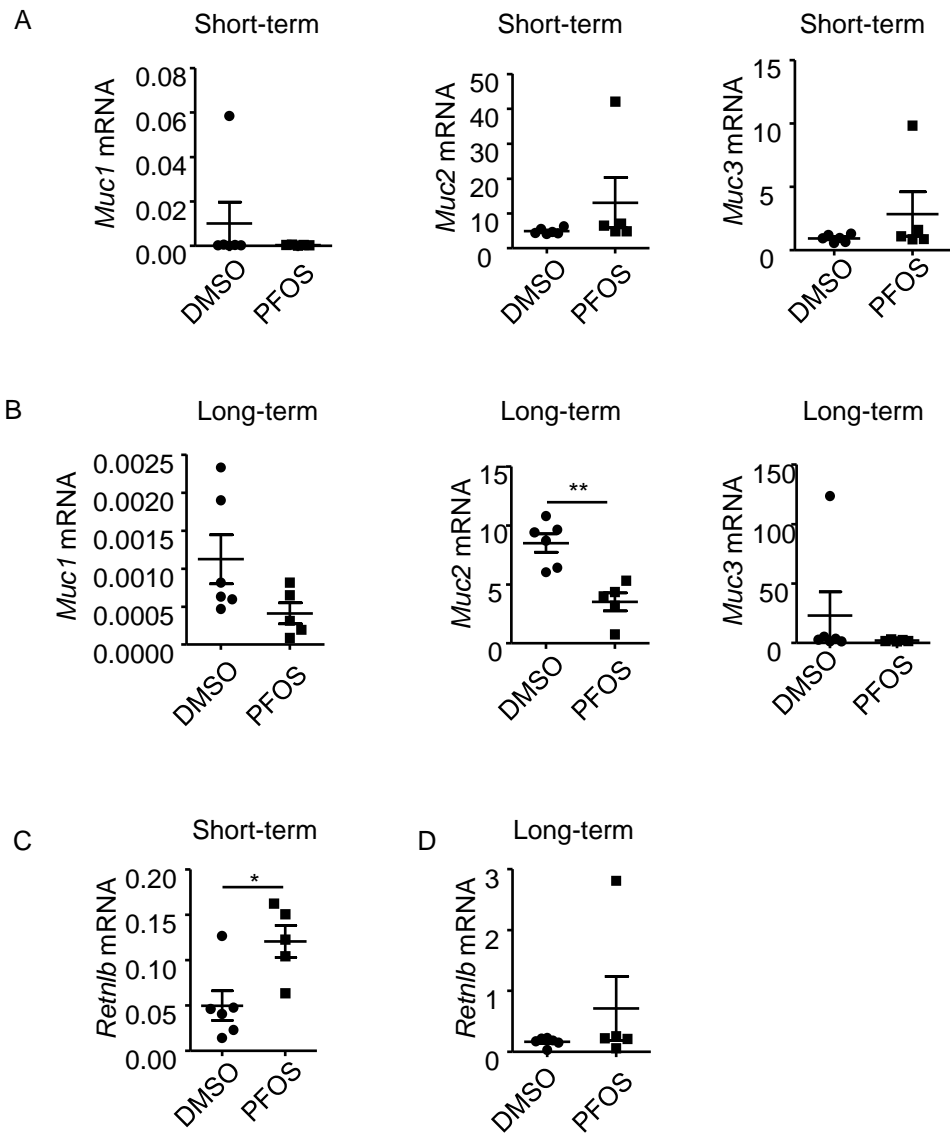

**Figure S1 PFOS has no effect on change of body weight at steady state**

*Wild-type* mice were treated by oral gavage with DMSO or PFOS (2mg/kg) in water on a daily basis. Percentages of weight change of the two groups of mice at indicated time points were shown. Data were pooled from 5 mice from each group. Error bars represent SEM. Data are representative of two independent experiments.

**Figure S2 Short-term treatment of PFOS promotes the IL-22 production from ILC3 under the steady state**

*Wild-type* mice were treated by oral gavage with DMSO or PFOS (2mg/kg) in water on a daily basis for 11 days. On day 12, large intestinal lamina propria lymphocytes were isolated from each group and analyzed by flow cytometry. Cells were stimulated with PMA and ionomycin for 4 hr before analysis. (A) The expression of CD3, CD4, ROR $\gamma$ t, IL-17, IL-22 was analyzed by flow cytometry. (B) Percentages of ILC3 (CD3<sup>-</sup>ROR $\gamma$ t<sup>+</sup> cells) gated on CD3<sup>-</sup> cells were shown. (C) Percentages of IL-22 and IL-17 expression gated on ILC3 were shown. Horizontal lines show the mean. Error bars represent SEM. Data are representative of two independent experiments.

**Figure S3 PFOS has no impact on IL-1 $\beta$  and IL-23 mRNA expression**

(A) On day 5 post *C. Rodentium* infection, large intestinal lamina propria lymphocytes (LPL) were isolated from each group. The expression of *I11 $\beta$*  and *I23a (p19)* in large intestinal LPLs was analyzed by realtime RT-PCR. (B) Large intestinal LPLs from *wild-type* mice were treated with PFOS at 100uM or DMSO for 20 hr. The expression of *I11 $\beta$*  and *I23a (p19)* in large intestinal LPLs was analyzed by realtime RT-PCR. Error bars represent SEM. Data were pooled from three sets of experiments.

**Figure S4 PFOS has no cytotoxic effect *in vitro***

Large intestinal LPLs were isolated from *wild-type* mice and treated with indicated concentrations of PFOS or DMSO for 20 hr. (A) Percentage of live cells was analyzed by staining with

“Fixable Violet Dead Cell Stain Kit” followed by flow cytometry. (B) Percentages of live cells in control or PFOS treated cells were shown. Error bars represent SEM. Data are representative of three independent experiments.

**Figure S5 PFOS promotes IL-22 production from ILC3 on a per-cell-based level *in vitro* through Ahr**

Large intestinal LPLs were isolated from *Ahr<sup>ff</sup>RORc-cre* or *Ahr<sup>ff</sup>* mice and treated with PFOS at 100uM or DMSO for 20 hr. Cells were stimulated with PMA and ionomycin for the last 4 hr before harvested for flow cytometry analysis. Mean fluorescence intensity (MFI) of IL-22 gated on ILC3 from indicated groups was shown. Horizontal lines show the mean. Error bars represent SEM. Data were pooled from two independent experiments.

**Figure S6 PFOS promotes IFN- $\gamma$  production from both non-T and T cells *in vitro***

Large intestinal LPLs were isolated from wild-type mice and treated with indicated concentrations of PFOS or DMSO for 20 hr. Cells were stimulated with PMA and ionomycin for the last 4h before harvested for flow cytometry analysis. (A and C) The expression of CD3, CD4 and IFN- $\gamma$  from indicated samples was analyzed by flow cytometry. (B) Percentages of IFN- $\gamma$  expression gated on CD3<sup>-</sup> were shown. (D) Percentages of IFN- $\gamma$  expression gated on CD3<sup>+</sup>CD4<sup>+</sup> cells were shown. Horizontal lines show the mean. Error bars represent SEM. Data are representative of two independent experiments.

**Figure S7 Long-term PFOS treatment promotes production of IL-22 from both ILC3 and Th17 cells under the steady state**

*Wild-type* mice were treated by oral gavage with DMSO or PFOS (2mg/kg) in water on a daily basis for 17 days. On day 18, large intestinal lamina propria lymphocytes were isolated from each group and analyzed by flow cytometry. Cells were stimulated with PMA and ionomycin for 4 hr before analysis. (A and E) The expression of CD3, CD4, ROR $\gamma$ t, IL-17, IL-22 and

IFN- $\gamma$  was analyzed by flow cytometry. (B) Percentages of ILC3 (CD3<sup>-</sup>ROR $\gamma$ t<sup>+</sup> cells) gated on CD3<sup>-</sup> cells were shown. Statistical analyses were performed using paired t-test. (C) Percentages of IL-22 and IL-17 expression gated on ILC3 were shown. (D) Percentages of IFN- $\gamma$  gated on CD3<sup>-</sup> cells were shown. (E) Percentages of Th17 cells (CD3<sup>+</sup>CD4<sup>+</sup>ROR $\gamma$ t<sup>+</sup> cells) gated on CD3<sup>+</sup>CD4<sup>+</sup> cells were shown. (F) Percentages of IL-22 and IL-17 production gated on Th17 cells were shown. (G) Percentages of IFN- $\gamma$  gated on CD3<sup>+</sup>CD4<sup>+</sup> cells were shown. Horizontal lines show the mean. Error bars represent SEM. Data are representative of two independent experiments.

### **Figure S8 PFOS affects the expression of RELM- $\beta$ and mucin 2 under the steady state**

*Wild-type* mice were treated by oral gavage with DMSO or PFOS (2mg/kg) in water on a daily basis for 11(short-term) or 17(long-term) days. (A) mRNA expression of Muc1, Muc2 and Muc3 on day 12 post PFOS treatment in colon tissues was analyzed by realtime RT-PCR. (B) mRNA expression of Muc1, Muc2 and Muc3 on day18 post PFOS treatment in colon tissues was analyzed by realtime RT-PCR. (C) mRNA expression of *Relmb* on day 12 post PFOS treatment in colon tissues was analyzed by realtime RT-PCR. (D) mRNA expression of *Relmb* on day 18 post PFOS treatment in colon tissues was analyzed by realtime RT-PCR. Horizontal lines show the mean. Error bars represent SEM. Data were pooled from two independent experiments.

Table S1. Primers used for Realtime RT-PCR

| <b>Gene</b>                      | <b>Primer</b>                  |
|----------------------------------|--------------------------------|
| <i>Cyp11a1</i> -FW               | 5'- GTCCCTCCTTACAGCCCAAG-3'    |
| <i>Cyp11a1</i> -RV               | 5'- GCTCTGACCACCCAGAATCC-3'    |
| <i>p19</i> -FW                   | 5'-CCAGTTCTGCTTGCAAAGG-3'      |
| <i>p19</i> -RV                   | 5'-GGTGATCCTCTGGCTGGA -3'      |
| <i>Il1<math>\beta</math></i> -FW | 5'-TGCCACCTTTTGACAGTGATG-3'    |
| <i>Il1<math>\beta</math></i> -RV | 5'-TGATGTGCTGCTGCGAGATT-3'     |
| <i>Muc1</i> -FW                  | 5'-GGAACATTTCTGGATTGTTTCTGC-3' |
| <i>Muc1</i> -RV                  | 5'-ACTGCATCTCATTCACTTTGACT-3'  |
| <i>Muc2</i> -FW                  | 5'-GCTGACGAGTGGTTGGTGAATG-3'   |
| <i>Muc2</i> -RV                  | 5'-GATGAGGTGGCAGACAGGAGAC-3'   |
| <i>Muc3</i> -FW                  | 5'-GGAACTGGTGGAGAGCGTAG-3'     |
| <i>Muc3</i> -RV                  | 5'-GGTGTACTTGGCCTTCAGGA-3'     |
| <i>Retnlb</i> -FW                | 5'-TTTCCTTTTCATCCTCGTCTCCC-3'  |
| <i>Retnlb</i> -RV                | 5'-GTGACAACCATCCCAGCAGGA-3'    |
| <i>Reg3b</i> -FW                 | 5'-CCACTCTGGGTGCAGAAC-3'       |
| <i>Reg3b</i> -RV                 | 5'-AATTCGGGATGTTTGCTGTC-3'     |
| <i>Reg3g</i> -FW                 | 5'-CAAGGTGAAGTTGCCAAGAA-3'     |
| <i>Reg3g</i> -RV                 | 5'-CCTCTGTTGGGTTTCATAGCC-3'    |

Table S2 16S rRNA gene specific primers used in this study

| Group                            | Taxonomic rank | Primer            | Sequence(5'to 3')         |
|----------------------------------|----------------|-------------------|---------------------------|
| Bacteria [1]                     | Order          | UniF340           | ACTCCTACGGGAGGCAGCAGT     |
|                                  |                | UniR514           | ATTACCGCGGCTGCTGGC        |
| <i>Actinobacteria</i> [2]        | Phylum         | Act920F3          | TACGGCCGCAAGGCTA          |
|                                  |                | Act1200R          | TCRTCCCCACCTTCCTCCG       |
| <i>Bacteroidetes</i> [3]         | Phylum         | Bact934F          | GGARCATGTGGTTTAATTCGATGAT |
|                                  |                | Bact1060R         | AGCTGACGACAACCATGCAG      |
| <i>Firmicutes</i> [4]            | Phylum         | 928F-Firm         | TGAAACTYAAAGGAATTGACG     |
|                                  |                | 1040FirmR         | ACCATGCACCACCTGTC         |
| <i>Proteobacteria</i> [5]        | Phylum         | Proteobacteria -F | CATGACGTTACCCGCAGAAGAAG   |
|                                  |                | Proteobacteria -R | CTCTACGAGACTCAAGCTTGC     |
| <i>Bacteroides</i> [1]           | Genus          | BactF285          | GGTTCTGAGAGGAGGTCCC       |
|                                  |                | UniR338           | GCTGCCTCCCGTAGGAGT        |
| <i>Lactobacillus</i> [1]         | Genus          | LabF362           | AGCAGTAGGGAATCTTCCA       |
|                                  |                | LabR677           | CACCGCTACACATGGAG         |
| <i>Enterbacteriaceae</i> [1]     | Family         | Uni515F           | GTGCCAGCAGCCGCGGTAA       |
|                                  |                | Ent826R           | GCCTCAAGGGCACAACCTCCAAG   |
| <i>Clostridium coccoides</i> [1] | Species        | UniF338           | ACTCCTACGGGAGGCAGC        |
|                                  |                | C.cocR491         | GCTTCTTAGTCAGGTACCGTCAT   |

|                                      |         |          |                                      |
|--------------------------------------|---------|----------|--------------------------------------|
| <i>E.coli</i> [6]                    | Species | E.coli-F | CATGCCGCGTGTATGAAGAA                 |
|                                      |         | E.coli-R | CGGGTAACGTCAATGAGCAA                 |
| <i>Lactobacillus acidophilus</i> [7] | Species | F_acid   | GAAAGAGCCCAAACCAAGTGATT              |
|                                      |         | R_acid   | CTTCCCAGATAATTCAACTATCGCTTA          |
| <i>Lactobacillus casei</i> [7]       | Species | F_casei  | CTATAAGTAAGCTTTGATCCGGAGATT<br>T     |
|                                      |         | R_casei  | CTTCCTGCGGGTACTGAGATGT               |
| <i>Lactobacillus johnsonii</i> [8]   | Species | Lj1      | CACTAGACGCATGTCTAGAG                 |
|                                      |         | La2      | AGTCTCTCAACTCGGCTATG                 |
| <i>Lactobacillus reuteri</i> [7]     | Species | F_reut   | ACCGAGAACACCGCGTTATTT                |
|                                      |         | R_reut   | CATAACTTAACCTAAACAATCAAAGAT<br>TGTCT |

## References

1. Barman, M., et al., *Enteric salmonellosis disrupts the microbial ecology of the murine gastrointestinal tract*. Infect Immun, 2008. **76**(3): p. 907-15.
2. Larmonier, C.B., et al., *Reduced colonic microbial diversity is associated with colitis in NHE3-deficient mice*. Am J Physiol Gastrointest Liver Physiol, 2013. **305**(10): p. G667-77.
3. Guo, X., et al., *Development of a real-time PCR method for Firmicutes and Bacteroidetes in faeces and its application to quantify intestinal population of obese and lean pigs*. Lett Appl Microbiol, 2008. **47**(5): p. 367-73.
4. Pedersen, R., et al., *Changes in the gut microbiota of cloned and non-cloned control pigs during development of obesity: gut microbiota during development of obesity in cloned pigs*. BMC Microbiol, 2013. **13**: p. 30.
5. Queipo-Ortuno, M.I., et al., *Influence of red wine polyphenols and ethanol on the gut microbiota ecology and biochemical biomarkers*. Am J Clin Nutr, 2012. **95**(6): p. 1323-34.
6. Arthur, J.C., et al., *Intestinal inflammation targets cancer-inducing activity of the microbiota*. Science, 2012. **338**(6103): p. 120-3.
7. Cui, Y., et al., *Different Effects of Three Selected Lactobacillus Strains in Dextran Sulfate Sodium-Induced Colitis in BALB/c Mice*. PLoS One, 2016. **11**(2): p.

e0148241.

8. Furet, J.P., P. Quenee, and P. Tailliez, *Molecular quantification of lactic acid bacteria in fermented milk products using real-time quantitative PCR*. *Int J Food Microbiol*, 2004. **97**(2): p. 197-207.
